1 Hybridization affects life-history traits and host specificity in *Diorhabda* spp.

2

3

Bitume, E.V., Bean, D. Stahlke, A.R., Hufbauer, R. A.

4

5

6 **Addresses**

7 <sup>1</sup> Bioagricultural Science and Pest Management, Plant Sciences C129, Colorado State University,  
8 Fort Collins, CO

9 <sup>2</sup> Colorado Department of Agriculture, Palisade, CO

10 *Statement of authorship:* EB, DB, and RA designed the experiments, EB performed the  
11 experiments and analysed the data. EB wrote the first draft of the manuscript, and DB, AS, and  
12 RH contributed substantially to revisions.

13 *Running title:* Hybridization in *Diorhabda*

14

15

16 Corresponding author:

17 Ellyn Bitume

18 BSPM

19 Plant Sciences C129

20 Colorado State University

21 Fort Collins, CO 80523-1177

22 [ebitume@gmail.com](mailto:ebitume@gmail.com)

23

24

25 *Abstract*

26

27 Hybridization is an influential evolutionary process that has been viewed alternatively as an  
28 evolutionary dead-end or as an important creative evolutionary force. In colonizing species, such  
29 as introduced biological control agents, hybridization can negate the effects of bottlenecks and  
30 genetic drift through increasing genetic variation. Such changes could be beneficial to a  
31 biological control program by increasing the chances of establishment success. However,  
32 hybridization can also lead to the emergence of transgressive phenotypes that could alter host  
33 specificity; an important consideration when assessing potential non-target impacts of planned  
34 agents. In a series of lab experiments, we investigated the effects of hybridization between three  
35 species of *Diorhabda* released to control invasive *Tamarix* (saltcedar) on life history traits  
36 through two generations, and through the third generation for one cross. Depending on the cross,  
37 hybridization had either a positive or neutral impact on development time, adult mass, and  
38 fecundity. We evaluated preference for the target (saltcedar) relative to a non-target host *Tamarix*  
39 *aphylla* (athel), and found host specificity patterns varied in two of the three hybrids,  
40 demonstrating the possibility for hybridization to alter host preference. Importantly, the overall  
41 effects of hybridization were inconsistent by cross, leading to unpredictability in the outcome of  
42 using hybrids in biological control.

43

44 *Keywords:*

45 Biological control

46 Life-history traits

47 Host specificity

48 Hybrid vigor

49 Inbreeding

50 Invasive species

51

52

53

54

55

56

57

58

59

## 60 1. Introduction

61 Hybridization is an influential evolutionary process that has been viewed alternatively as  
62 an evolutionary dead-end, because hybrids are often less fit than the parental species (Mayr  
63 1963; Dobzhanski 1970) or as an important creative evolutionary force (Anderson & Stebbins  
64 1954; Ellstrand & Schierenbeck 2000). On the detrimental side, hybrid breakdown, or  
65 outbreeding depression, can decrease performance of hybrid individuals across a suite of traits  
66 linked to fitness, such as development time, mortality, and fecundity (Burton *et al.* 1999;  
67 Edmands 2002). On the positive side, hybridization can increase fitness relative to parents  
68 directly through heterozygote advantage (overdominance of beneficial traits) (Edmands 2002;  
69 Hedrick & Garcia-Dorado 2016; Lee *et al.* 2016) or by alleviating high mutational load  
70 (heterosis) and reducing inbreeding depression, and indirectly through restoring genetic variation  
71 lost through genetic drift or bottlenecks in population size (genetic rescue). Even in populations  
72 that have not experienced strong drift or bottlenecks, hybridization can increase overall  
73 population genetic variation, resulting in increased ability to respond to selection pressures  
74 (Fisher 1930). Additionally, hybridization can facilitate the formation of novel genotypes,  
75 potentially producing ‘transgressive’ phenotypes that fall outside the range of either parent  
76 (Rieseberg *et al.* 1999). Alternatively, hybridization can in some cases have minimal effects if  
77 the genetic distance between parents is small (Mallet 2005).

78 Intraspecific hybridization between recently diverged species may be particularly  
79 beneficial in colonizing populations that pass through strong bottlenecks in population size, in  
80 turn losing genetic variation, and potentially becoming inbred (Ellstrand & Schierenbeck 2000;  
81 Dlugosch & Parker 2008; Rius & Darling 2014; Laugier *et al.* 2016). In the planned release of  
82 specialized biological control agents, the goal is for the intentionally released population to

83 establish and propagate (Seastedt 2015), to feed on the target host (typically an invasive weed or  
84 insect), and not shift to use other, non-target hosts. Biological control programs have a fairly low  
85 success rate (<50%), mostly due to lack of establishment of agents in their new environment  
86 (Van Driesche *et al.* 2010). As an evolutionary mechanism, hybridization might allow these  
87 establishing populations to better face adaptive challenges in the novel environment. There is  
88 some evidence that releasing different “strains” or ecotypes of biological control agents in an  
89 effort to increase genetic variation might improve establishment success (Hopper *et al.* 1993;  
90 Henry *et al.* 2010). New evidence suggests that increased genetic variation can be even more  
91 important than augmenting population size in promoting population growth (Frankham 2015;  
92 Hufbauer *et al.* 2015; Frankham 2016). Colonizing populations also experience novel  
93 environments in which transgressive phenotypes may, by chance, have higher fitness than  
94 parental phenotypes (Ellstrand & Schierenbeck 2000). Yet, the quantification of genetic variation  
95 in populations of biological control agents planned for release is not yet a standard procedure,  
96 likely because of the lack of studies investigating the effects of increased variation on long-term  
97 establishment.

98         Releasing genetically distinct ecotypes in the same area can promote hybridization. Only  
99 a few studies have looked at hybridization in biological control agents (Hoffmann *et al.* 2002;  
100 Mathenge *et al.* 2010; Benvenuto *et al.* 2012; Szucs *et al.* 2012). Szucs *et al.* (2012) found that  
101 hybridization improved performance in vital life-history traits, which could improve control of  
102 the target pest. However, there is also evidence that hybridization can decrease host specificity or  
103 increase host range as a result of changes in phenotype (Hoffmann *et al.* 2002; Mathenge *et al.*  
104 2010). Such a change would increase the risk of biological control to non-target species  
105 dramatically. Thus, it is imperative that more experiments are executed to understand the

106 consequences of hybridization for biological control programs, including evaluating the degree  
107 to which it will be possible to draw general conclusions versus research being needed on a case-  
108 by-case basis.

109 We present research in which we quantify the effects of hybridization between biological  
110 control agents in the genus *Diorhabda* that were released to control *Tamarix* (saltcedar, or  
111 tamarisk) in North America. Saltcedar in North America is comprised of a hybrid swarm of  
112 *Tamarix chinensis* and *T. ramosissima* (Gaskin and Schall 2002). It is an invasive weed that has  
113 colonized riparian habitats from Montana to Mexico (Gaskin & Schaal 2002). In 2001, the  
114 USDA's Animal and Plant Health Inspection Service (USDA APHIS) approved the open field  
115 release of the central Asian salt cedar leaf beetle, *D. elongata*, as a biological control agent for  
116 saltcedar (DeLoach et al. 2003). *Diorhabda elongata* was classified as a single wide-ranging  
117 species that specialized on *Tamarix* spp and comprised different subspecies and ecotypes. To  
118 match environmental conditions in North America, the saltcedar biological control program  
119 eventually utilized seven *Diorhabda* ecotypes with native ranges stretching from north Africa to  
120 central Asia (Tracy & Robbins 2009; Bean *et al.* 2013a). A recent taxonomic revision of the  
121 *Tamarix*-feeding *Diorhabda* has used morphological and biogeographical data to define this  
122 group as a complex comprising five species: *D. meridionalis*, *D. carinulata*, *D. carinata*, and *D.*  
123 *sublineata* (Tracy & Robbins 2009). Recent genetic studies using amplified fragment length  
124 polymorphisms (AFLPs) revealed four major clades within this group which coincide with the  
125 four morphospecies (Bean *et al.* 2013b). There was also a fifth species, *D. meridionalis*, not  
126 currently used in the saltcedar biological control program. Currently, *D. carinulata* is the most  
127 widespread of the species in North America and covers large areas in Oregon, Idaho, Wyoming,  
128 Colorado, Utah, Nevada, northern Arizona, and northern New Mexico (Bean *et al.* 2013a). The

129 other three species have all been released in Texas and have started spreading (Michels *et al.*  
130 2013). Hybridization is possible between all four taxa, but hybrids between *D. carinulata* and  
131 each of the other three species produce few viable offspring. In contrast, egg viability of hybrids  
132 between *D. elongata*, *D. carinata*, and *D. sublineata* is comparable to that of the parents (Bean *et*  
133 *al.* 2013b). We crossed these three species reciprocally, and tracked performance over three  
134 generations to quantify the effects of hybridization. We measured several life history traits  
135 crucial to fitness, as well as host preference for saltcedar relative to a non-target plant, *Tamarix*  
136 *aphylla* (athel hereafter) for both hybrid offspring and the parental species.

## 137 2. Materials & Methods

### 138 2.1 Organism 139

140 The beetles used in our experiments stemmed from samples originally collected from  
141 saltcedar in Eurasia and North Africa. Descendants of these samples were used to establish  
142 laboratory populations maintained at the Palisade Insectary, Biological Pest Control Program,  
143 Colorado Department of Agriculture, Palisade, CO (CDA Palisade). Colonies were maintained  
144 on cuttings of saltcedar, including *T. ramosissima*, *T. chinensis*, and their hybrids (Gaskin &  
145 Schaal 2002), in 7.5 liter capacity plastic containers with mesh siding for ventilation in  
146 incubators under a light regime of 16:8 and 27°C/16°C. *Diorhabda carinata* (“C” hereafter) used  
147 in this study were originally collected in 2002 near Karshi (Qarshi), Uzbekistan (38.86 N, 65.72  
148 E; elevation 350 m), and *Diorhabda sublineata* (“S” hereafter) originated near the town of Sfax,  
149 Tunisia (34.66 N, 10.67 E, elevation 10 m). Both these species were maintained in the lab prior  
150 to our experiments. *Diorhabda elongata* (“E” hereafter) were collected from Sfakaki, Crete,  
151 Greece (35.83 N, 24.6 E, elevation 7 m) and in 2004 they were first released upstream of  
152 Esparto, CA along Cache Creek in the Capay Valley. Unlike the other two species, *D. elongata*

153 used in our experiments were collected in 2015 from the field in the Capay Valley and used to  
154 start a laboratory colony. No other species were released into the Capay Valley nor have any  
155 been established within 150 miles, and therefore it is reasonable to assume that there was no  
156 chance for hybridization before our experiments.

## 157 2.2 Crosses

158 To produce the first generation of hybrids, seven virgin females and seven males of each  
159 species were placed together into a plastic bucket with mesh siding (7.5 liter) with saltcedar.  
160 Since male female directionality can affect the fitness of hybrid offspring (Payseur & Rieseberg  
161 2016), we crossed each species reciprocally. We thus made the following hybrids: *D. carinulata*  
162 x *D. elongata* ( $C_f \times E_m$ ,  $E_f \times C_m$ ), *D. carinulata* x *D. sublineata* ( $C_f \times S_m$ ,  $S_f \times C_m$ ), *D. elongata* x  
163 *D. sublineata* ( $E_f \times S_m$ ,  $S_f \times E_m$ ), plus the parents ( $C_f \times C_m$ ,  $E_f \times E_m$ ,  $S_f \times S_m$ ). To keep inbreeding  
164 depression to a minimum, we initiated two separate buckets for each of the parental lines so that  
165 density remained the same but so the parental generation had 14 families rather than 7 for the  
166 crosses. All adults were allowed to remain in the buckets for five days of egg-laying.

## 167 2.3 $F_1$ adult performance test

168 We counted the number of eggs produced over 48 hours as an estimate of performance of  
169 first generation hybrids. Buckets were checked daily for emergence of  $F_1$  adults. On the day of  
170 emergence, adults were sexed and mating pairs were placed into a plastic container (0.4L) with a  
171 paper towel lining the bottom and food. The containers were checked daily for eggs. The number  
172 of eggs produced was counted for 48 hours after the first eggs were laid. After this time,  $F_1$   
173 adults were removed and killed by freezing.

## 174 2.4 $F_2$ larval performance test

175           We measured percent hatching of all eggs laid in the first 48 hours, development time (in  
176 days), and adult mass (mg) attained by each  $F_2$  larva. Upon emergence, the date was recorded as  
177 well as the number of eggs that successfully hatched. Counting eggs is challenging due to the  
178 three-dimensional nature of the egg clutches. Following (Bean *et al.* 2013b), to ensure accuracy  
179 we also counted the number of larvae and compared this with the number of eggs. If the number  
180 of eggs was less than the number of larvae, we used the number of larvae as the total number of  
181 eggs produced. If the number of eggs was greater than the number of larvae, we conducted a  
182 recount of the clutch. Out of the hatched larvae from each mating pair, up to five were randomly  
183 chosen and allowed to develop individually.

184           Larvae were maintained in small plastic cups (0.4L) and given fresh saltcedar with its  
185 stem in a water-filled 1.5mL eppendorf tube each day. A paper-towel lined the bottom of each  
186 cup. When the larvae reached their last stage of development, 2 cm of sand was placed in each  
187 cup to provide conditions favorable for pupation. All larvae were maintained in incubators under  
188 a light regime of 16:8 (L:D) and 27°C/16°C, and rotated every other day to standardize  
189 environmental effects.

#### 190           2.5 $F_2$ adult preference test

191           We conducted a host preference test to determine if hybridization affected host  
192 preference for the non-target species, athel, presenting beetles with a choice between saltcedar  
193 and athel. Athel is an ornamental that is found at more southern latitudes in the US and is  
194 considered invasive in the southwestern U.S. (Gaskin & Shafroth 2005). *Tamarix* hybrids of *T.*  
195 *ramosissima* and *T. chinensis* (saltcedar) and are considered the preferred field host of  
196 *Diorhabda*. Previous host testing showed that the three *Diorhabda* species used in this study can  
197 survive as well on athel as on saltcedar, will oviposit on either saltcedar or athel under laboratory



198 no-choice conditions, and showed an inconsistent preference for saltcedar under choice  
199 conditions (Milbrath & DeLoach 2006a; Milbrath & DeLoach 2006b). However, saltcedar is  
200 preferred at field sites (Moran *et al.* 2009), and the intrinsic rate of increase of beetle populations  
201 is reduced on athel due to smaller egg mass size and a delayed start to oviposition (Milbrath &  
202 DeLoach 2006b).

203         Between 24 and 48 hours after emergence, we sexed and weighed the  $F_2$  adults. The  
204 beetles were placed in a plastic tub (3L) with two eppendorf tubes containing equal amounts of  
205 either athel or saltcedar. Each beetle was placed in the middle of the tub, with both plants placed  
206 equidistantly at 10 cm from the center. The beetle remained in the plastic tub for 24 hours, at  
207 which time the amount of frass under each plant was weighed to the nearest 0.1 g (DeLoach *et*  
208 *al.* 2003).

#### 209         2.6 $F_3$ larval performance test on two different hosts

210         We measured  $F_3$  larval performance on athel and saltcedar. After the host-choice test,  
211 mating pairs were formed with  $F_2$  adults from the same cross. All  $F_2$  adults were given saltcedar  
212 foliage to feed on regardless of what they chose as their host in the adult preference test. They  
213 were placed in the same plastic dish as previously described and allowed to mate and oviposit.  
214 The date of first oviposition, the number of eggs laid in 48 hours, and the percent hatching was  
215 recorded. Larvae from each mating pair were split and a maximum of five larvae were placed in  
216 a plastic dish with either athel or saltcedar. We measured development time to adult and adult  
217 mass.

#### 218         2.7 Statistical analysis

219  
220         Our interests center on comparing the fitness of hybrids to their parental species. Thus,  
221 each analysis was done separately for each of the 7 pairs of parental species and their respective

222 two hybrid crosses (male/female reciprocal). All statistical analysis was conducted using R  
223 version 3.3.2 (R\_Core\_Team 2016). For the first generation, we analyzed differences in the total  
224 number of eggs produced between hybrids and parental species using a standard linear model.  
225 The number of eggs was log-transformed to meet the assumption of homogeneity of variance.  
226 Percent hatching was analyzed as a proportion of hatched eggs compared to the total number of  
227 eggs using a generalized linear model with quasibionomial error distribution. Cross was the only  
228 fixed effect for number of eggs produced and percent hatching in the first-generation analysis.  
229 For the second and third generations, we quantified the development time from egg to adult  
230 (days), adult mass (mg), and host choice. For development time and adult weight, we used linear  
231 mixed-effects models through the lme4 package (Bates *et al.* 2015) with cross, sex and their  
232 interaction as fixed effects, and family as a random effect. For host choice with a binary response  
233 (saltcedar or athel), we used a generalized linear mixed effects model with a binomial error  
234 distribution. For the third generation, we also included the random effect of cup nested within  
235 family for development time and adult weight.

### 236 3. Results

#### 237 3.1 Egg count, percent hatching

238  
239 Hybridization did not significantly affect the number of  $F_1$  eggs laid in 48 hours for any  
240 of the crosses (Tables 1-3). Cross had a marginally significant influence on percent of eggs that  
241 hatched with the  $E \times E$  and  $E_f \times S_m$  cross producing slightly fewer viable eggs than the other  
242 crosses ( $F_{3,37} = 2.82$ ,  $P = 0.052$ , Table 2). In the  $F_2$ , only for the  $S \times C$  cross was there a  
243 significant effect of cross on the number of eggs laid in 48 hours, where hybrids produced  
244 significantly more eggs than either parental species ( $F_{3,39} = 2.97$ ,  $P = 0.044$ , Table 1, Figure 1).

245 Cross did not affect the percentage of eggs hatched for any crosses in the second generation  
246 (Table 1-3).

### 247 3.2 Development time, adult mass

248  
249 In the S × C crosses, females were larger (effect of sex:  $\chi^2 = 12.98$ ,  $df = 1$ ,  $P < 0.001$ ,  
250 effect of cross:  $\chi^2 = 16.39$ ,  $df = 3$ ,  $P < 0.001$ ) and hybrids developed faster (effect of sex:  $\chi^2 =$   
251  $9.93$ ,  $df = 1$ ,  $P = 0.002$ , effect of cross:  $\chi^2 = 20.60$ ,  $df = 3$ ,  $P < 0.001$ ) (Table 1, 4, Figure 2). For  
252 the S × E cross, there was a significant interaction between sex and cross in development time, in  
253 that males developed slower than females in the S × S line (interaction cross\*sex:  $\chi^2 = 8.90$ ,  $df =$   
254  $3$ ,  $P = 0.031$ , Tables 2, 4). We also found a significant effect of sex and cross on adult mass in  
255 the S × E cross, with females being overall larger (effect of sex:  $\chi^2 = 7.28$ ,  $df = 1$ ,  $P = 0.007$ ,  
256 effect of cross:  $\chi^2 = 17.50$ ,  $df = 3$ ,  $P < 0.001$ , Tables 2, 4). There was no effect of sex or cross on  
257 development time or adult mass for the E × C cross, although overall, females tended to be  
258 larger.

259 For the third generation, we were only able to investigate the effects of hybridization for  
260 the S × C cross (*D. sublineata* × *D. carinata*) due to limitations in the availability of our host  
261 plants. Development time was significantly affected by host plant and by cross, with both parents  
262 and hybrids developing slower on athel (effect of cross:  $\chi^2 = 9.74$ ,  $df = 4$ ,  $P = 0.029$ ; effect of  
263 plant:  $\chi^2 = 10.22$ ,  $df = 1$ ,  $P = 0.001$ , Tables 1, 5, Figure 3). While there is a trend for hybrids to  
264 develop slower than parents regardless of host plant, there was no significant decrease in  
265 development time in hybrids compared to parents (effect of cross: Hybrids develop slower than  
266 the parents regardless of host plant, yet contrasts between crosses were not significant. Adult  
267 weight was not affected by hybridization, however females were larger regardless of cross (effect  
268 of sex:  $\chi^2 = 10.124$ ,  $df = 1$ ,  $P = 0.001$ , Tables 1, 5).

269        *3.3 Host choice*

270  
271            We tested the host preference of individuals from all crosses in the second generation.  
272    Due to limitations in our host plant resources and, because of differences seen in the second  
273    generation, we also examined host preference for the S × C cross in the third generation. Sex did  
274    not affect host choice for any of the crosses in the second generation (Tables 1-3). Cross  
275    significantly affected host choice in the S × C cross (effect of cross:  $\chi^2 = 9.87$ ,  $df = 3$ ,  $P = 0.031$ )  
276    and S × E cross (effect of cross ( $\chi^2 = 9.23$ ,  $df = 3$ ,  $P = 0.026$ ), whereas there was no difference in  
277    host preference between hybrids and their parents in the E × C cross (Tables 1-4, Figure 4).  
278    There was no effect of hybridization on host preference in the S × C cross in the third generation  
279    (effect of cross:  $\chi^2 = 1.163$ ,  $df = 3$ ,  $P = 0.7619$ , Tables 1, 5).

280        *4. Discussion*

281            In introduced species, the effects of hybridization can influence local adaption and  
282    determine the fate of colonization success and establishment (Rius & Darling 2014). Introduced  
283    biological control agents undergo similar pressures as newly invading species, and understanding  
284    the mechanisms behind population growth and establishment are crucial to the implementation of  
285    successful biological control. In this study, we investigated the effects of hybridization on  
286    various life history traits and host preference for three different species of the biological control  
287    agent *Diorhabda*. We confirmed that all three species were reproductively compatible (Bean *et*  
288    *al.* 2013b), and that found that reciprocal crosses produced viable offspring through at least two  
289    generations. Life history traits beyond the production of viable eggs were either unchanged or  
290    improved with hybridization when compared to the parental species. These results support the  
291    hypothesis that these species have not experienced reproductive isolation for long enough to  
292    allow the evolution of genetic incompatibilities.

293           Hybridization can have positive, neutral, or negative effects on fitness. These effects  
294 depend on the genetic distance between mixing populations and the interactions between genes  
295 and environment. Hybrid vigor is commonly seen in the first generation of admixture between  
296 genetically distinct populations, and is typically thought to be due to masking of deleterious  
297 alleles rather than overdominance (Szulkin *et al.* 2010), whereas hybrid breakdown is commonly  
298 seen in the second or later generations due to recombination of the parental genes, allowing for  
299 the possibility of deleterious allele combinations (heterozygote disadvantage) (Dobzhansky  
300 1950; Edmands 2002). In our study, there was no difference between parents and their hybrid  
301 offspring in fecundity or percent hatching in the first generation in any cross. Previous molecular  
302 work done by Bean *et al.* (2013b) showed that while all four *Diorhabda* species separated into  
303 their own clades, the three species examined here were likely more closely related to each other  
304 than to the congeneric *D. carinulata*. It is possible that these species are not genetically distinct  
305 enough to be detrimentally affected by hybridization. However, the beetles used in our study had  
306 been lab reared for varying amounts of time (at least ten generations), and may have become  
307 inbred or lost variation via drift, both of which could reduce fitness. Thus, an alternative  
308 explanation is that positive effects of crossing, via masking of deleterious mutations could have  
309 balanced out potentially negative effects of hybridization, leading to zero, or close to zero, net  
310 change in life history traits. The masking of deleterious mutations can persist for many  
311 generations (Frankham 2016; Hedrick & Garcia-Dorado 2016), and thus further study  
312 investigating the effects of hybridization for more than three generations would increase our  
313 understanding.

314           Our results show that some of our crosses benefited greatly from hybridization in  
315 fecundity and development time in the second generation, and thus we see no evidence of hybrid

316 breakdown.  $S \times C$  crosses produced 67% more eggs and developed approximately 7 days shorter  
317 than the parental species. The  $E \times C$  cross exhibit the same trend, although this was only  
318 marginally significant. Other crosses showed no effect of hybridization, and none of our crosses  
319 suffered a fitness cost. In the  $S \times C$  cross, where we could examine a third generation, we saw no  
320 effect of hybridization on fecundity, but we did see a trend that hybrids were developing slower  
321 on both host plants. For this analysis, our sample size was lower than for the previous  
322 generations, and so further work is necessary to determine if development time slowed because  
323 of hybridization.

324       Changes in host specificity in a released agent are one of the most concerning issues to  
325 scientists studying biological control (Van Klinken & Edwards 2002; Brodeur 2012; McEvoy *et*  
326 *al.* 2012). Our results show that host specificity can indeed be affected by hybridization, and that  
327 the phenotype can vary depending on the maternal or paternal species. In the  $S \times C$  crosses, host  
328 preference of the hybrid followed the preference of the maternal species, whereas in the  $S \times E$   
329 cross, hybrids showed no preference for either host plant where the parents both showed a strong  
330 preference for the target host. Host specificity depends upon a suite of traits, such as behavior,  
331 morphology, and life-history strategies and as such is highly constrained (Zwolfer & Harris  
332 1971; Giebink *et al.* 1984; Chang *et al.* 1987). Even so, in more generalist species than are  
333 typically used for biological control, host use has been shown to have a genetic basis, and can  
334 thus vary between individuals and populations (Singer & Parmesan 1993; Funk 1998). In our  
335 study, the inherited pattern for host use depended not only on the cross, but the preference of the  
336 maternal species. A growing body of literature suggests that for herbivorous insect species,  
337 mothers have been shown to influence host use (Amarillo-Suarez & Fox 2006; Egan *et al.* 2011;  
338 Cahenzli & Erhardt 2013). Egan *et al.* (2011) specifically demonstrated that host-use and

339 performance are traits with sex-linked maternal influence. Consequently, the pattern of host  
340 specificity in hybrid crosses can be hard to predict since it will depend not only on the amount of  
341 genetic variation across a suite of traits, but also parental influence.

342 Using hybridization in biological control presents unique challenges. On one hand,  
343 increased genetic variation, potentially from hybridization, can buffer introduced populations  
344 against adaptive challenges and thus increase the probability of establishment and effective  
345 control (Hopper *et al.* 1993). On the other, the genetic admixture of previously isolated  
346 populations might give rise to new phenotypes that are less desirable, such as a change in host  
347 specificity (Hoffmann *et al.* 2002; Mathenge *et al.* 2010). Our results demonstrate that while  
348 some crosses benefit from hybridization in terms of development time and fecundity, differences  
349 in host specificity due to hybridization is of concern.

350

351

352

353

354

355

356

357

358

359

360

361

362

363

364

365

366

367

368

369

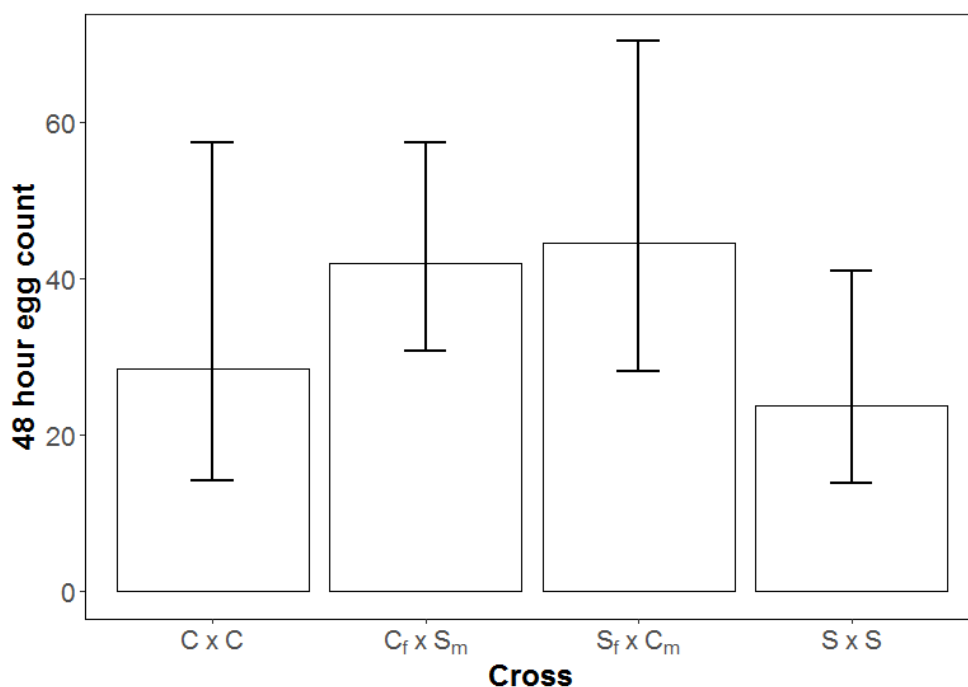

370

371

372

373

Figure 1: Number of eggs produced in first 48 hours by *D. carinata* ( $C \times C$ ), *D. sublineata* ( $S \times S$ ), and their hybrids in the second generation. Cross significantly affected egg production, with hybrids producing more than either parental species. Bars represent 95% confidence intervals.

374  
375  
376  
377  
378  
379  
380  
381  
382  
383  
384  
385  
386  
387  
388  
389  
390  
391  
392  
393  
394  
395  
396  
397  
398  
399  
400  
401  
402  
403  
404  
405  
406  
407  
408  
409  
410  
411  
412  
413  
414  
415  
416  
417  
418  
419

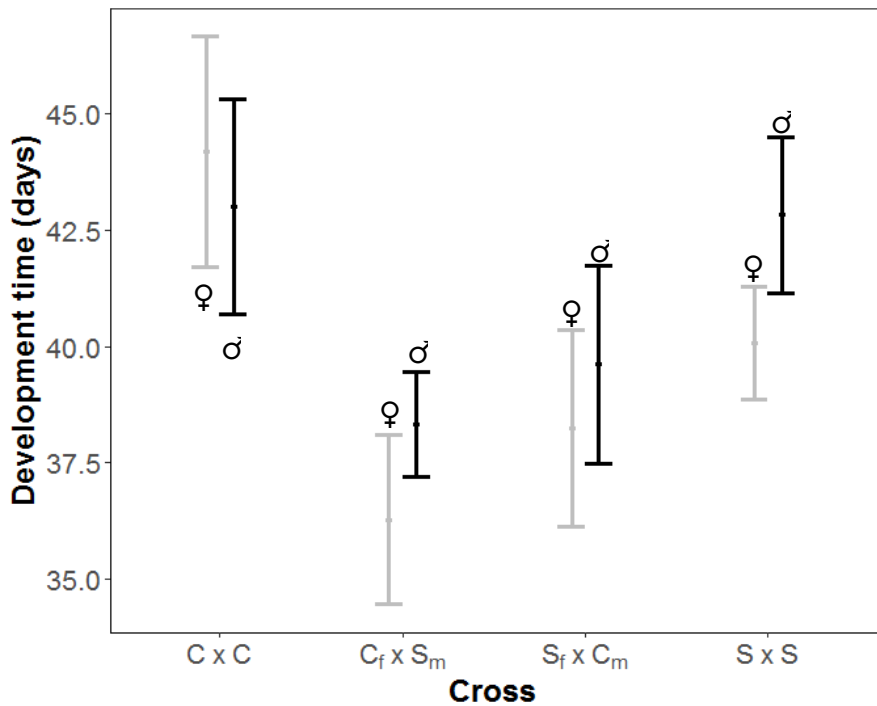

Figure 2: Development time from hatching until adult for each sex of *D. carinata* (C × C), *D. sublineata* (S × S) and their hybrids in the second generation. Cross significantly affected development time, with hybrids developing faster than either parental species. Grey and black lines represent females and males, respectively. Bars represent 95% confidence intervals.



420  
421  
422  
423  
424  
425  
426  
427  
428  
429  
430  
431  
432  
433  
434  
435  
436  
437  
438  
439  
440  
441  
442  
443  
444  
445  
446  
447  
448  
449  
450  
451  
452  
453  
454  
455  
456  
457  
458  
459  
460  
461  
462  
463  
464  
465

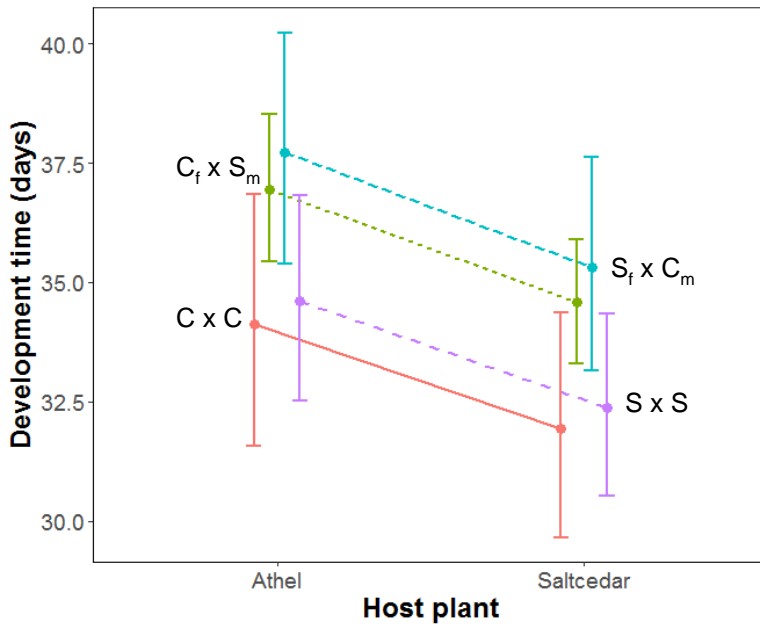

Figure 3: Development time on athel (non-target) and saltcedar (target) for *D. carinata* ( $C \times C$ ), *D. sublineata* ( $S \times S$ ), and their hybrids after three generations of hybridization.  $S_f \times C_m$  are long close dashes,  $C_f \times S_m$  small dashes,  $S \times S$  long spaced dashes, and  $C \times C$  solid line. Host plant significantly affected development time with beetles developing slower on the non-target host.

466  
467  
468  
469  
470  
471  
472  
473  
474  
475  
476  
477  
478  
479  
480  
481  
48  
48

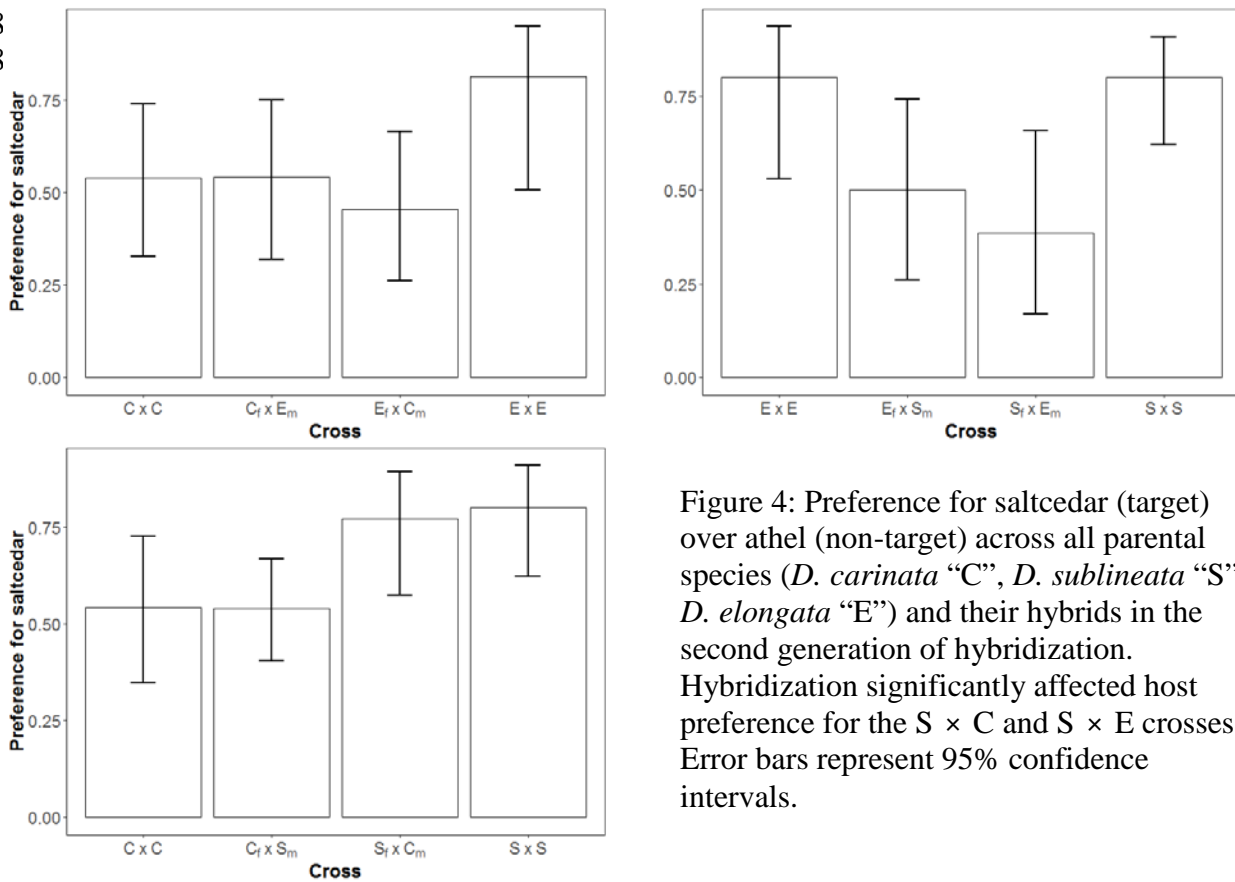

Figure 4: Preference for saltcedar (target) over athel (non-target) across all parental species (*D. carinata* “C”, *D. sublineata* “S”, *D. elongata* “E”) and their hybrids in the second generation of hybridization. Hybridization significantly affected host preference for the S × C and S × E crosses. Error bars represent 95% confidence intervals.

Table 1: Trait means (95% CI) for each generation of the *D. sublineata* by *D. carinata* cross. Letters indicate significant differences between crosses.

| Gen | Trait                     | Cross                             |                                   |                                   |                                   | F value                             | P             |
|-----|---------------------------|-----------------------------------|-----------------------------------|-----------------------------------|-----------------------------------|-------------------------------------|---------------|
|     |                           | C × C                             | Cr × Sm                           | Sr × Cm                           | S × S                             |                                     |               |
| 1   | 48 hour egg count         | 25.53 (20.08, 32.46) <sup>a</sup> | 21.54 (17.13, 27.08) <sup>a</sup> | 30.14 (22.38, 40.59) <sup>a</sup> | 20.25 (15.73, 26.08) <sup>a</sup> | F <sub>3, 69</sub> = 1.733          | 0.1682        |
|     |                           | 20                                | 22                                | 13                                | 18                                |                                     |               |
|     | Proportion hatching       | 91.4% (66.0, 99.0) <sup>a</sup>   | 90.9% (68.0, 98.6) <sup>a</sup>   | 91.8% (59.9, 99.6) <sup>a</sup>   | 94.3% (67.2, 99.8) <sup>a</sup>   | F <sub>3, 60</sub> = 0.8425         | 0.476         |
|     |                           | 17                                | 20                                | 12                                | 15                                |                                     |               |
|     | Dev time (days) (male)    | 43.6 (41.2, 45.9) <sup>a</sup>    | 38.2 (36.3, 40.1) <sup>b</sup>    | 39.6 (37.4, 41.9) <sup>ab</sup>   | 43.5 (41.0, 45.9) <sup>a</sup>    |                                     |               |
|     |                           | N                                 | 14                                | 31                                | 18                                | 17                                  |               |
|     | Dev time (days) (female)  | 44.1 (41.6, 46.7) <sup>a</sup>    | 36.2 (34.3, 38.2) <sup>b</sup>    | 38.7 (36.2, 41.3) <sup>b</sup>    | 39.8 (37.6, 41.9) <sup>b</sup>    |                                     |               |
|     |                           | N                                 | 11                                | 22                                | 12                                | 13                                  |               |
|     | Adult mass (mg) (male)    | 21.0 (19.3, 22.8) <sup>ab</sup>   | 22.6 (21.2, 24.0) <sup>a</sup>    | 19.4 (18.0, 21.0) <sup>b</sup>    | 18.3 (16.9, 19.8) <sup>b</sup>    | See Table 4 for statistical results |               |
|     |                           | N                                 | 14                                | 31                                | 18                                |                                     |               |
| 2   | Adult mass (mg) (female)  | 22.5 (18.5, 27.5) <sup>ab</sup>   | 25.8 (22.2, 29.9) <sup>a</sup>    | 20.6 (16.9, 25.1) <sup>ab</sup>   | 19.2 (16.2, 22.8) <sup>b</sup>    |                                     |               |
|     |                           | N                                 | 11                                | 22                                | 12                                | 13                                  |               |
|     | Preference for saltcedar  | 54.2% (34.6, 72.5) <sup>a</sup>   | 53.8% (40.3, 66.8) <sup>a</sup>   | 76.9% (57.2, 89.2) <sup>a</sup>   | 80.0% (62.1, 90.7) <sup>a</sup>   |                                     |               |
|     |                           | N                                 | 24                                | 52                                | 26                                | 30                                  |               |
|     | 48 hour egg count         | 25.0 (16.1, 38.8) <sup>a</sup>    | 41.7 (32.1, 54.1) <sup>a</sup>    | 45.6 (33.0, 63.1) <sup>a</sup>    | 27.0 (18.9, 38.7) <sup>a</sup>    | <b>F<sub>3, 39</sub> = 2.9659</b>   | <b>0.0437</b> |
|     |                           | N                                 | 6                                 | 17                                | 11                                | 9                                   |               |
|     | Proportion hatching       | 93.2% (26.5, 99.1) <sup>a</sup>   | 94.7% (67.7, 99.8) <sup>a</sup>   | 94.2% (50.0, 99.9) <sup>a</sup>   | 79.7% (29.7, 98.9) <sup>a</sup>   | F <sub>3, 26</sub> = 1.3756         | 0.2722        |
|     |                           | 3                                 | 15                                | 7                                 | 5                                 |                                     |               |
|     | Dev time (days) saltcedar | 31.9 (29.7, 34.3) <sup>a</sup>    | 34.6 (33.3, 35.9) <sup>a</sup>    | 35.3, (33.2, 37.6) <sup>a</sup>   | 32.4 (30.5, 34.3) <sup>a</sup>    |                                     |               |
|     |                           | N                                 | 9                                 | 38                                | 9                                 | 12                                  |               |
|     | Dev time (days) athel     | 34.1 (31.6, 36.9) <sup>a</sup>    | 37.0 (35.4, 38.6) <sup>a</sup>    | 37.7 (35.4, 40.2) <sup>a</sup>    | 34.6 (32.5, 36.9) <sup>a</sup>    |                                     |               |
|     |                           | N                                 | 3                                 | 24                                | 11                                | 7                                   |               |
| 3   | Adult mass (mg) (male)    | 19.5 (15.9, 23.9) <sup>a</sup>    | 19.7 (17.7, 21.8) <sup>a</sup>    | 18.6 (15.8, 22.0) <sup>a</sup>    | 16.7 (14.1, 19.7) <sup>a</sup>    | See Table 5 for statistical results |               |
|     |                           | N                                 | 9                                 | 38                                | 9                                 |                                     |               |
|     | Adult mass (mg) (female)  | 22.5 (18.4, 27.6) <sup>a</sup>    | 22.8 (20.6, 25.3) <sup>a</sup>    | 21.6 (18.1, 25.6) <sup>a</sup>    | 19.3 (16.4, 22.7) <sup>a</sup>    |                                     |               |
|     |                           | N                                 | 3                                 | 24                                | 11                                | 7                                   |               |
|     | Preference for saltcedar  | 69.0% (37.2, 89.3) <sup>a</sup>   | 61.8% (47.3, 74.5) <sup>a</sup>   | 50.2% (30.3, 75.7) <sup>a</sup>   | 71.4% (45.6, 88.1) <sup>a</sup>   |                                     |               |
|     |                           | 12                                | 62                                | 20                                | 19                                |                                     |               |

484  
485

Table 2: Trait means (95% CI) for each generation of the *D. sublineata* by *D. elongata* cross. Letters indicate significant differences between crosses.

| Gen | Trait                             | Cross                             |                                   |                                   |                                   | F value                             | P              |
|-----|-----------------------------------|-----------------------------------|-----------------------------------|-----------------------------------|-----------------------------------|-------------------------------------|----------------|
|     |                                   | S × S                             | S <sub>f</sub> × E <sub>m</sub>   | E <sub>f</sub> × S <sub>m</sub>   | E × E                             |                                     |                |
| 1   | 48 hour egg count                 | 20.25 (15.45, 26.55) <sup>a</sup> | 22.46 (16.12, 31.28) <sup>a</sup> | 26.24 (18.84, 36.55) <sup>a</sup> | 18.04 (10.16, 32.03) <sup>a</sup> | F <sub>3, 42</sub> = 0.4807         | 0.5706         |
|     | N                                 | 18                                | 12                                | 12                                | 4                                 |                                     |                |
| 1   | Proportion hatching               | 94.3% (67.2, 99.8) <sup>a</sup>   | 90.6% (58.5, 99.3) <sup>a</sup>   | 87.62% (51.6, 98.9) <sup>a</sup>  | 87.8% (30.2, 99.9) <sup>a</sup>   | <b>F<sub>3, 37</sub> = 2.8245</b>   | <b>0.05193</b> |
|     | N                                 | 15                                | 12                                | 10                                | 4                                 |                                     |                |
| 2   | Dev time (days) (male)            | 43.4 (40.8, 46.2) <sup>a</sup>    | 37.5 (34.7, 40.5) <sup>b</sup>    | 39.5 (35.5, 44.0) <sup>ab</sup>   | 42.2 (38.6, 46.3) <sup>ab</sup>   | See Table 4 for statistical results |                |
|     | N                                 | 17                                | 9                                 | 5                                 | 13                                |                                     |                |
| 2   | Dev time (days) (female)          | 39.8 (37.8, 42.0) <sup>a</sup>    | 38.0 (35.2, 41.0) <sup>a</sup>    | 42.4 (39.7, 45.3) <sup>a</sup>    | 43.3 (39.2, 47.7) <sup>a</sup>    |                                     |                |
|     | N                                 | 13                                | 5                                 | 10                                | 3                                 |                                     |                |
| 2   | Adult mass (mg) (male)            | 18.1 (16.2, 20.2) <sup>a</sup>    | 13.1 (11.5, 15.1) <sup>b</sup>    | 17.1 (14.1, 20.8) <sup>ab</sup>   | 17.0 (14.6, 19.9) <sup>ab</sup>   |                                     |                |
|     | N                                 | 17                                | 9                                 | 5                                 | 13                                |                                     |                |
| 2   | Adult mass (mg) (female)          | 19.1 (16.7, 21.9) <sup>a</sup>    | 15.6 (12.8, 19.0) <sup>a</sup>    | 21.5 (18.1, 25.5) <sup>a</sup>    | 18.8 (14.5, 24.3) <sup>a</sup>    |                                     |                |
|     | N                                 | 13                                | 5                                 | 10                                | 3                                 |                                     |                |
| 2   | Preference for <i>Tamarix</i> spp | 80.0% (62.1, 90.7) <sup>a</sup>   | 38.5% (17.0, 65.6) <sup>b</sup>   | 50.0% (26.0, 74.0) <sup>ab</sup>  | 80.0 (53.0, 93.4) <sup>ab</sup>   |                                     |                |
|     | N                                 | 30                                | 13                                | 14                                | 15                                |                                     |                |
| 2   | 48 hour egg count                 | 27.0 (17.7, 41.2) <sup>a</sup>    | 27.0 (14.4, 50.9) <sup>a</sup>    | 45.1 (21.8, 93.6) <sup>a</sup>    | 28.0 (11.4, 68.3) <sup>a</sup>    | F <sub>3, 14</sub> = 0.622          | 0.6124         |
|     | N                                 | 9                                 | 4                                 | 3                                 | 2                                 |                                     |                |
| 2   | Proportion hatching               | 79.7% (29.7, 98.9) <sup>a</sup>   | 70.5% (14.2, 98.9) <sup>a</sup>   | 96.6% (18.1, 96.7) <sup>a</sup>   | 94.1% (4.3, 92.5) <sup>a</sup>    | F <sub>3, 7</sub> = 0.9465          | 0.4682         |
|     | N                                 | 5                                 | 3                                 | 2                                 | 1                                 |                                     |                |

486  
487  
488  
489  
490  
491  
492  
493  
494  
495  
496  
497  
498

Table 3: Trait means (95% CI) for each generation of the *D. elongata* by *D. carinata* cross. Letters indicate significant differences between crosses.

| Gen                 | Trait                              | N                              | Cross                             |                                   |                                   |                                   | F Value                             | P      |
|---------------------|------------------------------------|--------------------------------|-----------------------------------|-----------------------------------|-----------------------------------|-----------------------------------|-------------------------------------|--------|
|                     |                                    |                                | E × E                             | E <sub>r</sub> × C <sub>m</sub>   | C <sub>r</sub> × E <sub>m</sub>   | C × C                             |                                     |        |
| 1                   | 48 hour egg count                  |                                | 18.04 (9.93,32.77) <sup>a</sup>   | 18.90 (14.37, 24.85) <sup>a</sup> | 18.36 (13.96, 24.14) <sup>a</sup> | 25.53 (19.55, 33.35) <sup>a</sup> | F <sub>3, 58</sub> = 1.3855         | 0.2837 |
|                     | Proportion hatching                | 4                              | 87.8% (35.1, 99.4) <sup>a</sup>   | 86.8% (58.1, 99.7) <sup>a</sup>   | 90.7% (61.9, 99.1) <sup>a</sup>   | 91.4% (66.0, 99.0) <sup>a</sup>   |                                     |        |
| 2                   |                                    | 4                              |                                   | 11                                | 14                                | 17                                | F <sub>3, 42</sub> = 0.7341         | 0.5376 |
|                     | Dev time (days) (male)             |                                | 42.4 (38.4, 46.3) <sup>a</sup>    | 39.5 (36.6, 42.4) <sup>a</sup>    | 42.5 (39.7, 45.4) <sup>a</sup>    | 43.6 (41.1, 46.3.4) <sup>a</sup>  | See Table 4 for statistical results |        |
|                     |                                    | 13                             |                                   | 12                                | 18                                | 14                                |                                     |        |
|                     | Dev time (days) (female)           |                                | 43.33 (38.57, 48.09) <sup>a</sup> | 39.13 (36.55, 41.71) <sup>a</sup> | 40.0 (36.3, 43.7) <sup>a</sup>    | 44.0 (41.02, 47.17) <sup>a</sup>  |                                     |        |
|                     |                                    | 3                              |                                   | 14                                | 5                                 | 11                                |                                     |        |
|                     | Adult mass (mg) (male)             |                                | 17.1 (14.9, 19.6) <sup>a</sup>    | 18.8 (16.7, 21.0) <sup>a</sup>    | 20.5 (18.4, 22.9) <sup>a</sup>    | 21.0 (19.0, 23.3) <sup>a</sup>    |                                     |        |
|                     |                                    | 13                             |                                   | 12                                | 18                                | 14                                |                                     |        |
|                     | Adult mass (mg) (female)           |                                | 18.8 (13.7, 25.8) <sup>a</sup>    | 22.1 (18.7, 26.1) <sup>a</sup>    | 19.7 (15.4, 25.2) <sup>a</sup>    | 22.7 (18.7, 27.5) <sup>a</sup>    |                                     |        |
|                     |                                    | 3                              |                                   | 14                                | 5                                 | 11                                |                                     |        |
|                     | Preference for <i>Tamarix</i> spp. |                                | 81.5% (50.8, 94.9) <sup>a</sup>   | 45.6% (26.2, 66.4) <sup>a</sup>   | 54.3% (31.9, 75.1) <sup>a</sup>   | 54.1% (32.8, 74.0) <sup>a</sup>   |                                     |        |
|                     | 15                                 |                                | 26                                | 22                                | 24                                |                                   |                                     |        |
| 48 hour egg count   |                                    | 28.0 (15.0, 52.0) <sup>a</sup> | 35.6 (27.9, 45.4) <sup>a</sup>    | 50.1 (33.8, 74.1) <sup>a</sup>    | 25.0 (17.5, 35.8) <sup>a</sup>    | F <sub>3, 22</sub> = 2.6441       | 0.07446                             |        |
|                     | 2                                  |                                | 13                                | 5                                 | 6                                 | F <sub>3, 14</sub> = 1.5797       | 0.2387                              |        |
| Proportion hatching |                                    | 94.1% (2.0, 97.2) <sup>a</sup> | 74.6% (58.6, 99.9) <sup>a</sup>   | 93.0% (35.3, 99.3) <sup>a</sup>   | 93.2% (26.5, 99.1) <sup>a</sup>   |                                   |                                     |        |
|                     |                                    | 1                              |                                   | 10                                | 4                                 | 3                                 |                                     |        |

499  
500  
501  
502  
503  
504  
505  
506  
507  
508  
509  
510  
511  
512  
513  
514  
515

Table 4: Results from generalized linear mixed-effects models for the second generation of hybridization for all crosses.

| Trait                    | <b>S × E Cross</b>                 |                                  |                                        | <b>Random effects</b> |         |          |         |
|--------------------------|------------------------------------|----------------------------------|----------------------------------------|-----------------------|---------|----------|---------|
|                          | Cross<br>$\chi^2$ , (df), <i>P</i> | Sex<br>$\chi^2$ , (df), <i>P</i> | Cross*sex<br>$\chi^2$ , (df), <i>P</i> | Family                |         | Residual |         |
|                          |                                    |                                  |                                        | Variance              | Std dev | Variance | Std dev |
| Dev time                 | <b>10.82, (3), 0.013</b>           | 0.47, (1), 0.493                 | <b>8.90, (3), 0.031</b>                | 0.006174              | 0.07857 | 0.001771 | 0.04208 |
| Adult mass               | <b>17.50, (3), &lt;0.001</b>       | <b>7.28, (1), 0.007</b>          | 2.56, (3), 0.464                       | 0.01266               | 0.1125  | 0.02347  | 0.1532  |
| Preference for saltcedar | <b>9.23, (3), 0.026</b>            | 0.98, (1), 0.322                 | 0.99, (3), 0.804                       | 0                     | 0       | 0        | 0       |
| <hr/>                    |                                    |                                  |                                        |                       |         |          |         |
|                          | <b>C × E Cross</b>                 |                                  |                                        |                       |         |          |         |
| Dev time                 | 5.99, (3), 0.112                   | 0.08 (1), 0.7837                 | 5.79, (3), 0.122                       | 0.008246              | 0.09081 | 0.001845 | 0.04295 |
| Adult mass               | 5.68, (3), 0.128                   | 3.47, (1), 0.0626                | 2.65, (3), 0.449                       | 0.01058               | 0.1029  | 0.0348   | 0.1868  |
| Preference for saltcedar | 3.66, (3), 0.300                   | 0.89, (1), 0.3464                | 3.69, (3), 0.297                       | 0.6548                | 0.8092  | 0        | 0       |
| <hr/>                    |                                    |                                  |                                        |                       |         |          |         |
|                          | <b>S × C Cross</b>                 |                                  |                                        |                       |         |          |         |
| Dev time                 | <b>20.60, (3), &lt;0.001</b>       | <b>9.934, (1) 0.002</b>          | 5.82, (3), 0.120                       | 9.787                 | 3.128   | 4.205    | 2.051   |
| Adult mass               | <b>16.39, (3), &lt;0.001</b>       | <b>12.982, (1), &lt;0.001</b>    | 2.73, (3), 0.435                       | 0.02041               | 0.1429  | 0.02266  | 0.1505  |
| Preference for saltcedar | <b>9.87, (3), 0.031</b>            | 0.3953, (1), 0.5295              | 1.89, (3), 0.596                       | 0                     | 0       | 0        | 0       |

517

518

519

520

521

522

523

524

525

526

527

528

529

530

531

532

533

534

535

536

537

Table 5: Results from generalized linear mixed-effects models for the third generation of the *D. sublineata* by *D. carinata* cross.

| Trait                    | <b>S × C Cross</b>        |                           |                           |                           |                   | <b>Random effects</b> |          |         |          |         |
|--------------------------|---------------------------|---------------------------|---------------------------|---------------------------|-------------------|-----------------------|----------|---------|----------|---------|
|                          | Cross                     | Sex                       | Plant                     | Plant * Cross             | Cup within family |                       | Family   |         | Residual |         |
|                          | $\chi^2$ , (df), <i>P</i> | $\chi^2$ , (df), <i>P</i> | $\chi^2$ , (df), <i>P</i> | $\chi^2$ , (df), <i>P</i> | Variance          | Std dev               | Variance | Std dev | Variance | Std dev |
| Dev time                 | <b>9.74, (3), 0.030</b>   | 0.022, (1), 0.882         | <b>10.22, (1), 0.001</b>  | 3.46, (3), 0.326          | 0.0027            | 0.052                 | 0.0009   | 0.0303  | 0.00305  | 0.05531 |
| Adult mass               | 4.16, (3), 0.244          | <b>9.74, (1), 0.021</b>   | 1.39, (1), 0.239          | 2.67, (3), 0.449          | 0.02133           | 0.1461                | 0        | 0       | 0.04805  | 0.2192  |
| Preference for saltcedar | 1.16, (3), 0.762          | 0.12, (1), 0.728          | 1.00, (1), 0.317          | 0.30, (3), 0.960          | 0                 | 0                     | 0        | 0       | 0        | 0       |

538

539 References

- 540 1.
- 541 Amarillo-Suarez, A.R. & Fox, C.W. (2006). Population differences in host use by a seed-beetle: local  
542 adaptation, phenotypic plasticity and maternal effects. *Oecologia*, 150, 247-258.
- 543 2.
- 544 Anderson, E. & Stebbins, G.L. (1954). Hybridization as an Evolutionary Stimulus. *Evolution*, 8, 378-388.
- 545 3.
- 546 Bates, D., Maechler, M., Bolker, B. & Walker, S. (2015). Fitting Linear Mixed-Effects Models Using lme4.  
547 *Journal of Statistical Software*, 67, 1-48.
- 548 4.
- 549 Bean, D., Dudley, T. & Hultine, K. (2013a). Bring on the Beetles! . In: *Tamarix: A Case Study of Ecological*  
550 *Change in the American West* (eds. Sher, A & Quigley, MF). Oxford University Press Oxford.
- 551 5.
- 552 Bean, D.W., Kazmer, D.J., Gardner, K., Thompson, D.C., Reynolds, B., Keller, J.C. *et al.* (2013b). Molecular  
553 genetic and hybridization studies of *Diorhabda* spp. released for biological control of tamarix.  
554 *Invasive Plant Science and Management*, 6, 1-15.
- 555 6.
- 556 Benvenuto, C., Cheyppé-Buchmann, S., Bermond, G., Ris, N. & Fauvergue, X. (2012). Intraspecific  
557 hybridization, life history strategies and potential invasion success in a parasitoid wasp.  
558 *Evolutionary Ecology*, 26, 1311-1329.
- 559 7.
- 560 Brodeur, J. (2012). Host specificity in biological control: Insights from opportunistic pathogens.  
561 *Evolutionary Applications*, 5, 470-480.
- 562 8.
- 563 Burton, R.S., Rawson, P.D. & Edmands, S. (1999). Genetic architecture of physiological phenotypes:  
564 Empirical evidence for coadapted gene complexes. *Am. Zool.*, 39, 451-462.
- 565 9.
- 566 Cahenzli, F. & Erhardt, A. (2013). Transgenerational acclimatization in an herbivore - host plant  
567 relationship. *Proc. R. Soc. B-Biol. Sci.*, 280, 8.
- 568 10.
- 569 Chang, N.T., Lynch, R.E., Slansky, F.A., Wiseman, B.R. & Habeck, D.H. (1987). QUANTITATIVE UTILIZATION  
570 OF SELECTED GRASSES BY FALL ARMYWORM LARVAE. *Entomologia Experimentalis Et Applicata*,  
571 45, 29-35.
- 572 11.
- 573 DeLoach, C.J., Lewis, P.A., Herr, J.C., Carruthers, R.I., Tracy, J.L. & Johnson, J. (2003). Host specificity of  
574 the leaf beetle, *Diorhabda elongata deserticola* (Coleoptera: Chrysomelidae) from Asia, a  
575 biological control agent for saltcedars (*Tamarix*: Tamaricaceae) in the Western United States.  
576 *Biological Control*, 27, 117-147.
- 577 12.



- 578 Dlugosch, K.M. & Parker, I.M. (2008). Invading populations of an ornamental shrub show rapid life  
579 history evolution despite genetic bottlenecks. *Ecology Letters*, 11, 701-709.  
580 13.
- 581 Dobzhansky, T. (1950). GENETICS OF NATURAL POPULATIONS .19. ORIGIN OF HETEROSIS THROUGH  
582 NATURAL SELECTION IN POPULATIONS OF DROSOPHILA-PSEUDOOSCURA. *Genetics*, 35, 288-  
583 302.  
584 14.
- 585 Edmands, S. (2002). Does parental divergence predict reproductive compatibility? *Trends Ecol. Evol.*, 17,  
586 520-527.  
587 15.
- 588 Egan, S.P., Janson, E.M., Brown, C.G. & Funk, D.J. (2011). Postmating isolation and genetically variable  
589 host use in ecologically divergent host forms of *Neochlamisus bebbianae* leaf beetles. *J. Evol.*  
590 *Biol.*, 24, 2217-2229.  
591 16.
- 592 Ellstrand, N.C. & Schierenbeck, K.A. (2000). Hybridization as a stimulus for the evolution of invasiveness  
593 in plants? *Proceedings of the National Academy of Sciences of the United States of America*, 97,  
594 7043-7050.  
595 17.
- 596 Fisher, R.A. (1930). *The genetical theory of natural selection*. Clarendon Press, Oxford, England.  
597 18.
- 598 Frankham, R. (2015). Genetic rescue of small inbred populations: meta-analysis reveals large and  
599 consistent benefits of gene flow. *Molecular Ecology*, 24, 2610-2618.  
600 19.
- 601 Frankham, R. (2016). Genetic rescue benefits persist to at least the F3 generation, based on a meta-  
602 analysis. *Biol. Conserv.*, 195, 33-36.  
603 20.
- 604 Funk, D.J. (1998). Isolating a role for natural selection in speciation: Host adaptation and sexual isolation  
605 in *Neochlamisus bebbianae* leaf beetles. *Evolution*, 52, 1744-1759.  
606 21.
- 607 Gaskin, J.F. & Schaal, B.A. (2002). Hybrid *Tamarix* widespread in U.S. invasion and undetected in native  
608 Asian range. *Proceedings of the National Academy of Sciences of the United States of America*,  
609 99, 11256-11259.  
610 22.
- 611 Gaskin, J.F. & Shafroth, P.B. (2005). HYBRIDIZATION OF TAMARIX RAMOSISSIMA AND T. CHINENSIS  
612 (SALT CEDARS) WITH T. APHYLLA (ATHEL) (TAMARICACEAE) IN THE SOUTHWESTERN USA  
613 DETERMINED FROM DNA SEQUENCE DATA. *Madrosc*, 52, 1-10.  
614 23.
- 615 Giebink, B.L., Scriber, J.M. & Wedberg, J.L. (1984). BIOLOGY AND PHENOLOGY OF THE HOP-VINE BORER,  
616 HYDRAECIA-IMMANIS GUENEE, AND DETECTION OF THE POTATO STEM BORER, HYDRAECIA-

- 617 MICACEA (ESPER) (LEPIDOPTERA, NOCTUIDAE), IN WISCONSIN. *Environmental Entomology*, 13,  
618 1216-1224.  
619 24.
- 620 Hedrick, P.W. & Garcia-Dorado, A. (2016). Understanding Inbreeding Depression, Purging, and Genetic  
621 Rescue. *Trends Ecol. Evol.*, 31, 940-952.  
622 25.
- 623 Henry, L.M., May, N., Acheampong, S., Gillespie, D.R. & Roitberg, B.D. (2010). Host-adapted parasitoids  
624 in biological control: Does source matter? *Ecological Applications*, 20, 242-250.  
625 26.
- 626 Hoffmann, J.H., Impson, F.A.C. & Volchansky, C.R. (2002). Biological control of cactus weeds:  
627 implications of hybridization between control agent biotypes. *Journal of Applied Ecology*, 39,  
628 900-908.  
629 27.
- 630 Hopper, K.R., Roush, R.T. & Powell, W. (1993). MANAGEMENT OF GENETICS OF BIOLOGICAL-CONTROL  
631 INTRODUCTIONS. *Annu. Rev. Entomol.*, 38, 27-51.  
632 28.
- 633 Hufbauer, R.A., Szucs, M., Kasyon, E., Youngberg, C., Koontz, M.J., Richards, C. *et al.* (2015). Three types  
634 of rescue can avert extinction in a changing environment. *Proceedings of the National Academy  
635 of Sciences of the United States of America*, 112, 10557-10562.  
636 29.
- 637 Laugier, G.J.M., Le Moguedec, G., Su, W., Tayeh, A., Soldati, L., Serrate, B. *et al.* (2016). Reduced  
638 population size can induce quick evolution of inbreeding depression in the invasive ladybird  
639 *Harmonia axyridis*. *Biological Invasions*, 18, 2871-2881.  
640 30.
- 641 Lee, Y.W., Fishman, L., Kelly, J.K. & Willis, J.H. (2016). A Segregating Inversion Generates Fitness  
642 Variation in Yellow Monkeyflower (*Mimulus guttatus*). *Genetics*, 202, 1473-+.  
643 31.
- 644 Mallet, J. (2005). Hybridization as an invasion of the genome. *Trends Ecol. Evol.*, 20, 229-237.  
645 32.
- 646 Mathenge, C.W., Holford, P., Hoffmann, J.H., Zimmermann, H.G., Spooner-Hart, R.N. & Beattie, G.A.C.  
647 (2010). Hybridization between *Dactylopius tomentosus* (Hemiptera: Dactylopiidae) biotypes and  
648 its effects on host specificity. *Bulletin of Entomological Research*, 100, 331-338.  
649 33.
- 650 McEvoy, P.B., Higgs, K.M., Coombs, E.M., Karaçetin, E. & Ann Starcevich, L. (2012). Evolving while  
651 invading: Rapid adaptive evolution in juvenile development time for a biological control  
652 organism colonizing a high-elevation environment. *Evolutionary Applications*, 5, 524-536.  
653 34.
- 654 Michels, G.J., Royer, T.A., Jones, E.N., Lange, R.A., Bynum, E.D., Ruthven, D.C. *et al.* (2013). New  
655 Establishment and County Records for *Diorhabda* spp. (Coleoptera: Chrysomelidae) and

- 656 Coniatus splendidulus (Coleoptera: Curculionidae) in the Texas Panhandle and Western  
657 Oklahoma. *Southwestern Entomologist*, 38, 173-181.  
658 35.
- 659 Milbrath, L.R. & DeLoach, C.J. (2006a). Acceptability and Suitability of Athel, Tamarix aphylla, to the Leaf  
660 Beetle Diorhabda elongata (Coleoptera: Chrysomelidae), a Biological Control Agent of Saltcedar  
661 (Tamarix spp.). *Environmental Entomology*, 35, 1379-1389.  
662 36.
- 663 Milbrath, L.R. & DeLoach, C.J. (2006b). Host specificity of different populations of the leaf beetle  
664 Diorhabda elongata (Coleoptera: Chrysomelidae), a biological control agent of saltcedar  
665 (Tamarix spp.). *Biological Control*, 36, 32-48.  
666 37.
- 667 Moran, P.J., DeLoach, C.J., Dudley, T.L. & Sanabria, J. (2009). Open field host selection and behavior by  
668 tamarisk beetles (Diorhabda spp.) (Coleoptera: Chrysomelidae) in biological control of exotic  
669 saltcedars (Tamarix spp.) and risks to non-target athel (T. aphylla) and native Frankenia spp.  
670 *Biological Control*, 50, 243-261.  
671 38.
- 672 Payseur, B.A. & Rieseberg, L.H. (2016). A genomic perspective on hybridization and speciation.  
673 *Molecular Ecology*, 25, 2337-2360.  
674 39.
- 675 R\_Core\_Team (2016). R: A language and environment for statistical computing. R Foundation for  
676 Statistical Computing. Vienna, Austria.  
677 40.
- 678 Rieseberg, L.H., Archer, M.A. & Wayne, R.K. (1999). Transgressive segregation, adaptation and  
679 speciation. *Heredity*, 83, 363-372.  
680 41.
- 681 Rius, M. & Darling, J.A. (2014). How important is intraspecific genetic admixture to the success of  
682 colonising populations? *Trends Ecol. Evol.*, 29, 233-242.  
683 42.
- 684 Seastedt, T.R. (2015). Biological control of invasive plant species: a reassessment for the Anthropocene.  
685 *New Phytologist*, 205, 490-502.  
686 43.
- 687 Singer, M.C. & Parmesan, C. (1993). SOURCES OF VARIATIONS IN PATTERNS OF PLANT INSECT  
688 ASSOCIATION. *Nature*, 361, 251-253.  
689 44.
- 690 Szucs, M., Eigenbrode, S.D., Schwarzländer, M. & Schaffner, U. (2012). Hybrid vigor in the biological  
691 control agent, Longitarsus jacobaeae. *Evolutionary Applications*, 5, 489-497.  
692 45.
- 693 Szulkin, M., Bierne, N. & David, P. (2010). HETEROZYGOSITY-FITNESS CORRELATIONS: A TIME FOR  
694 REAPPRAISAL. *Evolution*, 64, 1202-1217.  
695 46.

- 696 Tracy, J.L. & Robbins, T.O. (2009). Taxonomic revision and biogeography of the Tamarix-feeding  
697 *Diorhabda elongata* (Brulle, 1832) species group (Coleoptera: Chrysomelidae: Galerucinae:  
698 Galerucini) and analysis of their potential in biological control of Tamarisk. *Zootaxa*, 1-152.  
699 47.
- 700 Van Driesche, R.G., Carruthers, R.I., Center, T., Hoddle, M.S., Hough-Goldstein, J., Morin, L. *et al.* (2010).  
701 Classical biological control for the protection of natural ecosystems. *Biological Control*, 54, S2-  
702 S33.  
703 48.
- 704 Van Klinken, R.D. & Edwards, O.R. (2002). Is host-specificity of weed biological control agents likely to  
705 evolve rapidly following establishment? *Ecology Letters*, 5, 590-596.  
706 49.
- 707 Zwolfer, H. & Harris, P. (1971). HOST SPECIFICITY DETERMINATION OF INSECTS FOR BIOLOGICAL  
708 CONTROL OF WEEDS. *Annu. Rev. Entomol.*, 16, 159-&.  
709
